# Supplementary material
Source: PubMed Central journal article supplement (PMC6649092)
Supplement: ao9b01166_si_001.pdf [file ao9b01166_si_001.pdf]

# Supplementary Information

## A Facile and Label-Free Electrochemical Biosensor for MicroRNA Detection Based on DNA Origami Nanostructures

Shuo Han<sup>#</sup>, Wenyan Liu<sup>†\*</sup>, Shuo Yang<sup>#</sup>, and Risheng Wang<sup>#\*</sup>

*<sup>#</sup>Department of Chemistry, Missouri University of Science and Technology, Rolla, MO  
65409, United States*

*<sup>†</sup>Center for Research in Energy and Environment, Missouri University of Science and  
Technology, Rolla, MO 65409, United States*

E-mail: [liuweny@mst.edu](mailto:liuweny@mst.edu), [wangri@mst.edu](mailto:wangri@mst.edu)

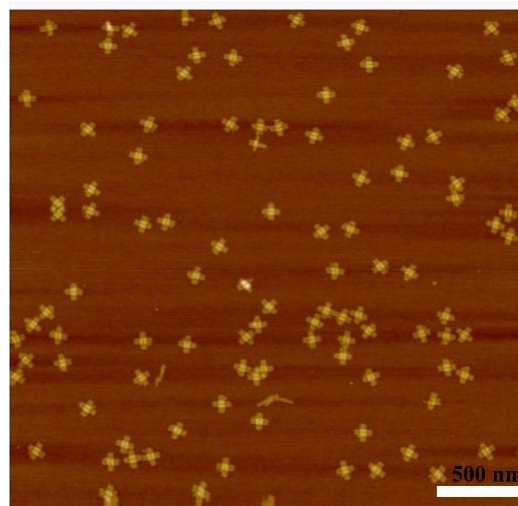

**Figure S1.** AFM image of the self-assembled cross-shaped DNA origami platform containing ssDNA probes.

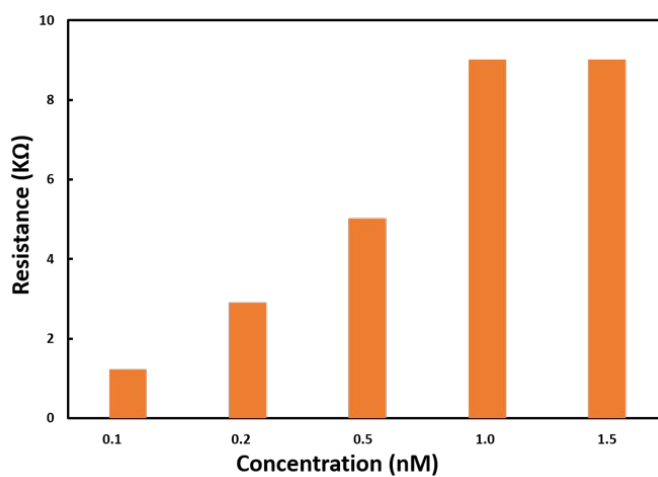

**Figure S2.** Optimization of the concentration of DNA origami attached on the gold electrode surface (ranging from 0.1, 0.2, 0.5, 1.0 to 1.5 nM). There is no obvious difference of resistance between 1.0 nM and 1.5 nM of DNA origami, therefore, the concentration of DNA origami was 1.0 nM for rest of experiments.

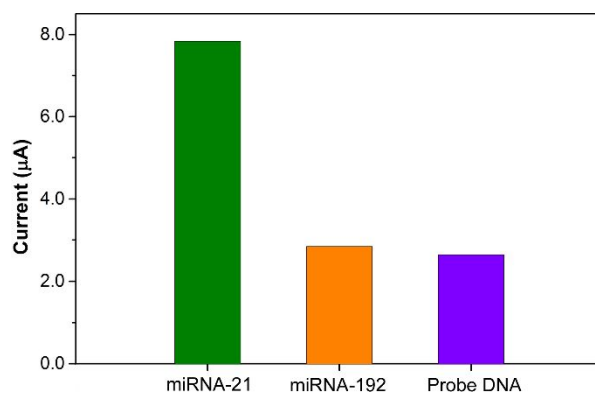

**Figure S3.** The selectivity of the proposed biosensor for the detection of target and mismatch miRNA. Please note the background noise of DNA origami template containing probe DNA due to the interaction of MB molecules with DNA origami scaffolds.

### MiRNA Sequences

|                                      |                                             |
|--------------------------------------|---------------------------------------------|
| miRNA-21 (target)                    | 5'-UAG CUU AUC AGA CUG AUG UUG A-3'         |
| Single-base mismatch on the terminal | 5'-UAG CUU AUC AGA CUG AUG UUG <b>C</b> -3' |
| Single-base mismatch on the middle   | 5'-UAG CUU AUC <b>G</b> GA CUG AUG UUG A-3' |
| miRNA-192 (non-complementary)        | 5'-CUG ACC UAU GAA UUG ACA GCC-3'           |

### Modified ssDNA probes

RC-M27-AS-DNA

TAGCTTATCAGACTGATGTTGATTCCATATTAATTAGACGGGAGAATTACAAAGTTACC

RC-M37-AS-DNA

TAGCTTATCAGACTGATGTTGATTGATTTTTTACAGAGAGAATAACATAAAAAACAG

RC-M49-AS-DNA

TAGCTTATCAGACTGATGTTGATTACCTGAGCAGAGGCCGAATTATTCAGAAAATAG

RC-M57-AS-DNA

TAGCTTATCAGACTGATGTTGATTCAAGAAAAATTGCTTTGAATACCAAGTTACAA

RC-M68-AS-DNA

TAGCTTATCAGACTGATGTTGATTTGATTTGATACATCGGGAGAAACACAACGGAG

RC-M29-AS-DNA

TAGCTTATCAGACTGATGTTGATTAAGCGCCAATTAAGTTGGGTAACGAACATACG

RC-M38-AS-DNA

TAGCTTATCAGACTGATGTTGATTTTGGGAAGCAGCTGGCTAAAGCTAGCTATTTTTGAGAGAT

RC-M50-AS-DNA

TAGCTTATCAGACTGATGTTGATTAGAAGTATAATAGATAATACATTTCTCTTCGC

RC-M58-AS-DNA

TAGCTTATCAGACTGATGTTGATTCTCGTATTGGTGCCTAACAACACTAGAACGAAC

RC-M70-AS-DNA

TAGCTTATCAGACTGATGTTGATTATTTTAAAGGAATTGAGGAAGGTTTGAGGCCG

### **Unmodified DNA Sequences used in DNA origami nanoplatfom:**

RC-M1 AGCTAATGCAGAACGCGCCTGTTTTAATATCC

RC-M2 CATCCTAATTTGAAGCCTTAAATCTTTTATCC

RC-M3 TGAATCTTGAGAGATAACCCACAAAACAATGA

RC-M4 AATAGCAATAGATGGGCGCATCGTACCGTATC

RC-M5 GGCCTCAGCTTGCATGCCTGCAGGGAATTCGT

RC-M6 AATCATGGTGGTTTTTCTTTTCACCCGCCTGG

RC-M7 CCCTGAGAGAGTTGCAGCAAGCGGGTATTGGG

RC-M8 CGCCAGGGTCATAGCTGTTTCCTGGACGGCCA

RC-M9 GTGCCAAGGAAGATCGACATCCAGATAGGTTA

RC-M10 CGTTGGTGTAGCTATCTTACCGAATTGAGCGC

RC-M11 TAATATCAACCTTCGCTAACGAGCCCGACTTG

RC-M12 CGGGAGGTTTTACGAGCATGTAGAACATGTT

RC-M13 CTGTCCAGACGACGACAATAAACAAACCAATC

RC-M14 AATAATCGCGTTTTAGCGAACCTCGTCTTTCC

RC-M15 AGAGCCTACAAAGTCAGAGGGTAAGCCCTTTT

RC-M16 TAAGAAAAGATTGACCGTAATGGGCCAGCTTT

RC-M17 CCGGCACCCACGACGTTGTAAAACGTGAAAT

RC-M18 TGTTATCCGGGAGAGGGCGGTTTGCTCCACGCT

RC-M19 GGTTTGCCCCAGCAGGCGAAAATCAATCGGCC

RC-M20 AACGCGGGCTCACAATTCCACACCCAGGGTT  
RC-M21 TTCCAGTGCTTCTGGTGCCGGAAGTGGGAAC  
RC-M22 AAACGGCGGTAAGCAGATAGCCGAAACTGAAC  
RC-M23 ACCCTGAAATTTGCCAGTTACAAATTCTAAGA  
RC-M24 ACGCGAGGGCTGTCTTTCCTTATCAAGTAATT  
RC-M25 GTACCGACAAAAGGTAATTCCAAG  
RC-M26 AACGGGTAGAAGGCTTATCCGGTAATAAACAG  
RC-M28 GTCGGATTCTCCACCAGGCA  
  
RC-M30 AGCCGGAAGCCAGCTGCATTAATGCTGTTTATGATGGTGTCTTTCCTGTAGCCAGCTTTAATCGATG  
RC-M31 GCAAAATTCGGGAAACCTGTGCTGCATAAAGTGTAAGCGATGTGCT  
RC-M32 GCAAGGCGTTCGCCATTCAGGCTGCGCAACTG  
RC-M33 GGAAGCGCTTTATCCCAATCCAAAAGCAAAT  
RC-M34 CAGATATATTAACCATACGGAAATTACCCAAAAGAACTGGCATGATTA  
RC-M35 AGGCATTTTCGAGCCAGTACTCATCG  
RC-M36 AGAACAGTACCGCGCCCAATAGCTAAGAAAC  
RC-M39 CCTAATGAACTGCCCGCTTTCAGCCCTTATA  
RC-M40 AATCAAAAGAATAGCCCTTTAAATATGCATTCTACTA  
RC-M41 GAGATAGGGTTGTCAGGATTAGAGAGTACCTATTCATT  
RC-M42 TTGCGCTCGTGAGCTAACTCACATGATAGCCC  
RC-M43 TATTACGCGGCGATCGGTGCGGGCGAGGATTT  
RC-M44 CAGCCTTTGTTAACGTCAAAAATTTCAATT  
RC-M45 GGAATCATCAAGCCGTTTTTATTTGTTATATA  
RC-M46 TCGCCATATTTAACAACGTTGCGGGGTTTTAAGCCCAA  
RC-M47 CCAACAGTGTGTGCCCGTATAAACAGTTAACCAGAGC  
RC-M48 ACTATATGCTCCGGCTTAGGTTGGTCATCGTA  
RC-M51 TAAAACATCTTTAATGCGCGAACTTAATTGCG  
RC-M52 CTATTAGTCGCCATTAATAAATACCATAGATTA  
RC-M53 GAGCCGTCTAGACTTTACAAACAATTCGACAA  
RC-M54 AATCGCGCAAAAGAAGTTAGTTAGCTTAAACAGCTTGATACGCCACGC  
RC-M55 TTTTAACTAAATGCTGATGCAAAAATTGAGAA  
RC-M56 CAAGACAAAATCATAGGTCTGAGACAAACAT  
RC-M59 CACCAGCAGGCACAGATTTAATTTCTCAATCATAAGGGAAC  
RC-M60 TGCTGGTAATATCCAGAACAATATAAGCGTAA  
RC-M61 GAATACGTGAAGATAAAACAGAGGATCTAAAA  
RC-M62 TATCTTTAAATCCTTTGCCCGAACCGCGACCTGC  
RC-M63 CGAAACAAAGTAATAACGGA  
RC-M64 TTCGCCTGCAAAATTAATTACATTAATAGTGA  
RC-M65 ATTTATCAAGAACGCGAGAAAAGCTAGTATAAAGCCAATAAAGAATACAC  
RC-M66 ATATGCGTTATACAAATCTTACCTTTTCAA  
RC-M67 TATATTTTGACGCTGAGAAGAGTCTAACAATT  
RC-M69 ATTTGTATCATCGCTTCTGAATTACAGTAACA  
RC-M71 TCAGTATTAACCCTTCTGACCTGATACCGCCA  
RC-M72 GCCATTGCAACAGGAAAAACGCTCTGGCCAAC  
RC-M73 AGAGATAGAACACCGCCTGCAACAAAATCAAC  
RC-M74 AGTAGAAAAGTTGAGTAACATTA  
RC-M75 TTTGGATTATACCTGATAAATTGTGTGCGAAATCGTTATTA  
RC-M76 GTACCTTTATTACCTTTTTTAATGCGATAGCT  
RC-M77 TAGATTAAGTTAATTCGATCTTCTTAGTATC  
RC-M78 TCATAATTACTAGAAAAAGCCTGTTGACCTAA  
RC-M79 ATTTAATGATCCTTGAAAACATAGGAAACAGT  
RC-M80 ACATAAATACGTGAGATGAATATATGGAAGGA  
RC-M81 ATTGAACCAATATAATCCTGATTGTCATTTTG  
RC-M82 CGGAACAATATCTGGTCAGTTGGCGTGCCACG  
RC-M83 CTGAGAGCAATAAAAAGGGACATTCATGGAAAT  
RC-M84 ACCTACATTTTGACGCTCAATCGTCAGTGCGC

RC-M85 CGACCAGTCAGCAGCAAATGAAAATCAAACCC  
RC-M86 TCAATCAAAGAAACCACCAGAAGGATGATGGC  
RC-M87 AATTCATCAACCATATCAAAATTATAGATTTT  
RC-M88 CAGGTTTACAATATATGTGAGTGATTAATTTT  
RC-M89 CCCTTAGAGTTTAAAATACCGACCCACCGGAA  
RC-M90 AAAAGGGTAAGATTGTATAAGCAAAAATTCGC  
RC-M91 AATAACCTTTAGAACCCTCATATAAAAGATTC  
RC-M92 GAAAGACTCAATTCTGCGAACGAGAAATGGTC  
RC-M93 CATAGTAATGACTATTATAGTCAGGGAAGCCC  
RC-M94 TAACAAAGTTAGGAATACCACATTTTACGAGG  
RC-M95 GCTGGCTGACCTTCATCAAGAGTAAATCAACG  
RC-M96 GTTGAATCTGCTCATTCAAGTGAAGCGCATAG  
RC-M97 CTTTACCCGAGCAACACTATCATAATTCATCA  
RC-M98 TTGATTCCCTCAAATATCGCGTTTTAATCAGGT  
  
RC-M99 AAAAAATTTGTTTGTAGCTATATTTTCTGTAACAG  
RC-M100 AAAACAGGGAGAAAGGCCGAGACGCAAGGAT  
RC-M101 GTTAAATTTTTGTAAATCAGCTCAAGCCCCA  
RC-M102 CACCATCACGGTTGATAATCAGAAATTTTTTA  
RC-M103 CGCGAGCTAAGCCTTTATTTCAACAGTCAAAT  
RC-M104 CTTCAAAGTGGAAGTTTCATTCCAATTTGGGG  
RC-M105 TTACCAGAATGACCATAAATCAAAAATTCGAG  
RC-M106 GCCCTGACTATTACAGGTAGAAAGACCCTCGT  
RC-M107 ACAGATGAACGGTGTACAGACCAGTAAGGCTT  
RC-M108 AACACATGAGAACACCAGAACGAGAAAGAGG  
RC-M110 ACGGTGTCCGAACCAGACCGGAAGAGTTCAGA  
RC-M112 ATGTACCCATATGATATTCAACCGAATACTTT  
RC-M113 ACCAATAGGAACGCCATCAAAAATTCAATCAT  
RC-M114 GATAAATTTTCGTA AAACTAGCATGAATTCGCGTCTGGCTGTCCGAAATCG  
RC-M115 ATAGTAGTAACATTATGACCCTGTTTCTAGCT  
RC-M116 CAAACTCCAACAGTTGAGTGTGTTTCGTAGAAGAACTCAAACCTTTGAATGG  
RC-M117 GAGGCTTTCTCAAATGCTTTAAAC  
RC-M118 TTGGGCTTTACGTTAATAAAAACGAAATAGCGA  
RC-M119 CGAACTGACCAACTTTGTAGTAAA  
RC-M120 GAAAAATCGAGATGGTTCAATATTTATCGGCCT  
RC-M123 AACGGTAAAATGCCGGAGAGGGTAAATCGGTT  
RC-M124 TTAAATGTGAGCGAGTAACAACTTAAGGAAACCGAGGAAA  
RC-M125 CTGGAGCAAACAAGAGCATCAACA  
RC-M126 CTGAATCTAAATCATAACAGGCAAGTCAGAGCATGAAAGGGGCTGGGGTG  
RC-M127 GGTAATAGGCGGAATCGTCATAAATTTAATTGCTCCTTTTCTTAATTG  
RC-M128 TCATTGTGTTATAACAGTCAGGACCCAGAGGG  
RC-M129 AACGAGGCGCAGACGGAACCTTAA  
RC-M130 CTGGCTCAAATTACCTTATGCGATAATGACAA  
RC-M132 GCTTAGAGGATAAGAGGTCATTTTTGAAACAT  
RC-M134 CTGAGAGTCTACAAAGGCTATCAGACTTGAGC  
RC-M135 CATTTGGGATTATCACCGTCACCGGTCATTGC  
RC-M136 CTCAGAGCACCGCCACCCTCAGAGATTAAGCA  
RC-M137 GAAAGTATTCGGAACCTATTATTCTGCGGATG  
RC-M138 CCACAGACACAACTACAACGCCTGATAGCGT  
RC-M139 CAACCATCCGATAGTTGCGCCGACTTTAAGAA  
RC-M140 ATAACCGATCATCTTTGACCCCCAGCGATTATACCAAGTTCATGTTACTTAGCCGG  
RC-M142 TGCCTATTTAAGAGGCTGAGACTCGAGTTTTCG  
RC-M144 AAAGGTGAAATTAGAGCCAGCAAAAAGCCGCCA  
RC-M145 CGCAATAATAACGGAATATTCATT  
RC-M146 TAGCACCAAAAATATTGTAGTACCGCAATAAGAGAATATAAA  
RC-M147 CGCCGCCAGAACCGCCTCCCTCAGATCACCAG

RC-M148 CTAAAGTTCATGTACCGTAACACTCTCAAGAGAAGGATTAGGATTA  
 RC-M149 TAAAACACTATATTCGGTCGCTGATTTTCGAGGAGAATTTTCGTAACGAT  
 RC-M150 GGGAGTTAAACGAAAGAGGCGTCGCTCAACAGTAGGGCTTATCCAATCG  
 RC-M153 AGACTCCTTTGAGGGAGGGAAGGTTTACCATTAGCAAGGCACCAGAGC  
 RC-M154 AGTATGTTAGCAAACGTAGAAAATGCGCCAAA  
 RC-M155 TCACCAATGGCGACATTCAACCGATATTACGC  
 RC-M156 TCAGACGAAATCAAAATCACCGGACGGAAACG  
 RC-M157 CCAGGCGGTTTTAACGGGGTCAGTGAGGCAGG  
 RC-M158 AATGAATTCATTTTCAGGGATAGCGCTCAGTA  
 RC-M159 TTTTTCGGGAGCCTTTAATTGTATCGTTAGTA  
 RC-M160 GCCACTACGAAGGCACCAACCTAAAAGGCCGC  
 RC-M161 TCCAAAAGGATCGTCACCCTCAGCTACGTAAT  
 RC-M162 ACCACCCTTTCTGTATGGGATTTTAAAAAGGC  
 RC-M163 GTAATAAGATAAGTGCCGTCGAGATCAGAGCC  
 RC-M164 CTTTTCATTTGGCCTTGATATTCAGTGTACTG  
 RC-M165 GACAAAAGGAAACCATCGATAGCATTGGCCAT  
 RC-M166 AAAGGTGCAACATATAAAAGAAACACAATCA  
 RC-M167 ATCAGTAGTTCATATGGTTTACCAACATACAT  
 RC-M168 TGGATCTTAGCCCCCTTATTAGCGGCACCCTA  
 RC-M169 ATAAGTATTTTTGATGATACAGGACAAACGAA  
  
 RC-M170 ACTTCAACTCAGAACCGCCACCCGGGTTGAT  
 RC-M171 ACAGCATCGTTGAAAATCTCCAAAGCTAAACA  
 RC-M172 GAAGTTTCCATTAAACGGGTAAAAAGCGAAAG  
 RC-M173 TTTTTCACGGAACGAGGGTAGCAATTCATGAG  
 RC-M174 CCGCCACCCAGTTTCAGCGGAGTGATAATAAT  
 RC-M175 TACATGGCAGCCCAGGAATAGGTGTCCTCAGAA  
 RC-M176 TCGGTCATCATTAAGCCAGAATGAAGCGTCA  
 RC-M177 ATAGAAAACGACAGAATCAAGTTTCGGCATT  
 RC-M27-AS CCATATTAATTAGACGGGAGAATTACAAAGTTACC  
 RC-M29-AS AAGCGCCAATTAAGTTGGGTAACGAACATACG  
 RC-M37-AS GATTTTTTACAGAGAGAATAACATAAAAACAG  
 RC-M38-AS TTGGGAAGCAGCTGGCTTAAAGCTAGCTATTTTTGAGAGAT  
 RC-M49-AS ACCTGAGCAGAGGCGAATTATTCAGAAAATAG  
 RC-M50-AS AGAAGTATAATAGATAATACATTTCTCTTCGC  
 RC-M57-AS CAAGAAAAATTGCTTTGAATACCAAGTTACAA  
 RC-M58-AS CTCGTATTGGTGCCTAACAACACTAGAACGAAC  
 RC-M68-AS TGATTTGATACATCGGGAGAAACACAACGGAG  
 RC-M70-AS ATTTTAAAGGAATTGAGGAAGGTTTGGGGCGG  
 RC-M109-AS AAACGAGACGACGATAAAAACCAAACCTAACGG  
 RC-M111-AS TGCGGGAGGAAAAGGTGGCATCAAACCTAAAGT  
 RC-M121-AS GAATCCCCTGCAAAAAGAAGTTTTGGTTGGGAA  
 RC-M131-AS CCAATACTTAAAATGTTTAGACTGGTAGCATT  
 RC-M133-AS ATAAAGCCGCAAAGAATTAGCAAACCACCACC  
 RC-M141-AS TCACCAGTAGCCCTCATATGATGAAAGACTACC  
 RC-M143-AS CCCTCAGACGCCACCAGAACCACCATGCCCCC  
 RC-M122-AS GTACCAAAAGCATTAAACATCCAATGGTGCTGTAGCTCAACATGTTT  
 RC-M151-AS TAGGAACCTTGTCTTTCCAGACGGTTTATCAGCTTGGCGCTTGCA  
 RC-M152-AS CACCACCGGCATTGACAGGAGGTTGCCTTGAGTAACATAATTTAGGCAG

### **Schematic drawing of the location of ssDNA probes on DNA origami surface**

The sequence number of each strand is corresponding to the reference listed below

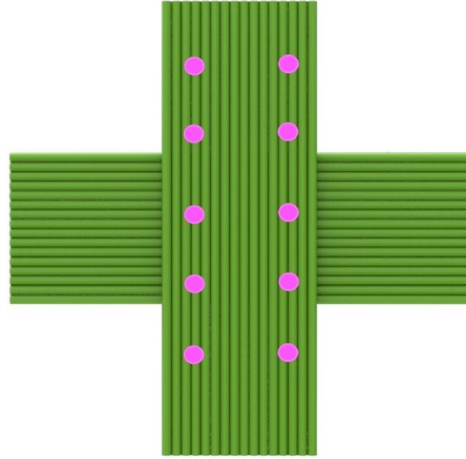

Reference:

W. Liu, H. Zhong, R. Wang, and N. Seeman, Crystalline two-dimensional DNA origami arrays, *Angew Chem Int Ed Engl*, **2011**, 50, 264-267
